# Supplementary material for: Comparison of outcome of patients with acute minor ischaemic stroke treated with intravenous t-PA, DAPT or aspirin
Source: HighWire-hosted journal article supplement (doi:10.1136/svn-2019-000319), 2020-10-19
Supplement: svn-2019-000319supp001_data_supplement.pdf [file svn-2019-000319supp001_data_supplement.pdf]

**Supplementary Material-Table 1: Main Safety and Functional Outcomes of Patients with Propensity Score Matching Model**

| Outcome               | Group   | n (%)         | PSM              |      |
|-----------------------|---------|---------------|------------------|------|
|                       |         |               | OR (95% CI)      | P    |
| mRS 0-1 at 3 months   | Aspirin | 160/182(87.9) | 0.77 (0.39-1.50) | 0.44 |
|                       | DAPT    | 162/181(89.5) | 0.90 (0.45-1.79) | 0.77 |
|                       | IV t-PA | 161/178(90.4) | ref              |      |
| mRS 0-2 at 3 months   | Aspirin | 168/182(92.3) | 0.79 (0.35-1.79) | 0.57 |
|                       | DAPT    | 169/181(93.4) | 0.93 (0.40-2.16) | 0.86 |
|                       | IV t-PA | 167/178(93.8) | ref              |      |
| Mortality at 3 months | Aspirin | 2/182(1.1)    | 1.00 (0.14-7.18) | 1.00 |
|                       | DAPT    | 0/181(0.0)    | -                | 0.96 |
|                       | IV t-PA | 2/182(1.1)    | ref              |      |

DAPT indicates dual antiplatelet therapy; IV t-PA, recombinant tissue plasminogen activator; OR, odds ratio; CI, confidence intervals; mRS, modified Rankin scale; PSM, propensity score matching.
